1 **Data and Text Mining**

2 **TransporterPAL: An integrative database Transporter Prediction ALgorithm**

3 Jane Dannow Dyekjær<sup>1</sup>, Alexander Kruhøffer Bloch Andersen<sup>1</sup>, Joel August Vest Madsen<sup>2</sup>, Jens

4 Preben Morth<sup>3</sup>, Lars Juhl Jensen<sup>4</sup>, Irina Borodina<sup>1,\*</sup>

5 <sup>1</sup>Novo Nordisk Foundation Center for Biosustainability, Technical University of Denmark,

6 Building 220, Kemitorvet, DK-2800, Kgs. Lyngby, Denmark

7 <sup>2</sup>VesTech, A N Hansens Alle 31a, DK-2900 Hellerup. Denmark

8 <sup>3</sup>DTU Bioengineering, Søtofts Plads, Building 221, DK-2800 Kgs. Lyngby, Denmark

9 <sup>4</sup>Novo Nordisk Foundation Center for Protein Research, Faculty of Health and Medical Sciences,

10 University of Copenhagen, Blegdamsvej 3B, DK-2200 Copenhagen N, Denmark

11 \*To whom correspondence should be addressed.

12 **Abstract**

13 **Motivation:** Natural products are used as drugs, cosmetic ingredients, pigments, flavors, and  
14 agricultural products. The compounds are retrievable as extracts from natural sources, but the  
15 yields are often low, and the final product may contain various impurities. These challenges can  
16 be solved by expressing the biosynthetic pathway in microbial cell factories and ensuring  
17 product secretion from the cell by using an appropriate transporter. However, insufficient  
18 knowledge of transporters for specific compounds often obstructs efficient secretion of the  
19 natural product. Therefore, our goal was to develop an algorithm that predicts transporters for a  
20 given compound using available public data.

21 **Results:** The web application TransporterPAL predicts suitable transporters for compounds by  
22 interconnecting data for biosynthetic genes and their interactions with transporters. The web  
23 application queries the STITCH, STRING, and UniProtKB databases via their respective APIs

24 and returns a set of potential transporters based on a compound and, optionally, the organism as  
25 input. For a test set of 61 transporter systems, each containing one or more transporters, a total of  
26 90 unique transporters with a known substrate, we could retrieve 45% of the transporters. To our  
27 knowledge, this is the first bioinformatics tool for predicting transporter candidates for a given  
28 molecule.

29 **Availability:** <https://transporterpal.com>

30 **Contact:** [irbo@biosustain.dtu.dk](mailto:irbo@biosustain.dtu.dk)

31 **Supplementary information:** Supplementary data are available at Bioinformatics online.

## 32 **1 Introduction**

33 The demand for natural products is increasing in the pharmaceutical and biotechnological  
34 industries. Due to the complexity of these molecules, the chemical synthesis of natural products is  
35 usually challenging, if not impossible. Alternatively, natural products can be produced cheaper  
36 and more sustainably by incorporating heterologous pathway genes into microbial cell factories.  
37 Secretion of the synthesized molecules from microbial cells is vital to alleviate cellular toxicity,  
38 prevent product degradation, and allow for high titer and purity (van der Hoek and Borodina,  
39 2020). Often, a specific transmembrane transporter protein is required to engineer the secretion of  
40 small molecules. However, transmembrane proteins are challenging to study, and many  
41 transporters are thus not well characterized. As a result, the knowledge of appropriate transporters  
42 is scarce, but the exploitation of data from several independent databases can provide clues about  
43 potential transporters.

44 We hypothesized that if we can extract pathway genes for biosynthesis of a compound and other  
45 proteins interacting with the compound, we can identify a suitable transporter among their  
46 interaction partners in a functional association network. Furthermore, assuming the transporter is

47 present within this expanded set of proteins, we can use text mining to differentiate transporters  
48 from other pathway proteins based on their functional description. Here, we present a web resource  
49 that interacts with public databases to predict potential transporters automatically for a given  
50 compound produced in nature, irrespective of protein annotation.

## 51 **2 Implementation**

52 STITCH (Szklarczyk *et al.*, 2016) is a database containing information about chemical–protein  
53 interactions from many sources, including biological pathway databases, automatic text mining of  
54 biomedical literature, and experimental data repositories. The STRING database (Szklarczyk *et*  
55 *al.*, 2021) similarly provides physical and functional protein–protein interactions integrated from  
56 various sources. Finally, UniProtKB (Bateman *et al.*, 2021) provides functional annotations of  
57 proteins, including Gene Ontology (GO) annotations related to transport activity.

58 Our workflow consists of the following steps, starting from a chemical and, optionally, an  
59 organism of interest: (i) use chemical–protein interactions from STITCH to obtain an initial set of  
60 proteins (Szklarczyk *et al.*, 2016), (ii) expand this set of proteins with their interaction partners  
61 using functional associations from STRING (Szklarczyk *et al.*, 2021), (iii) select the transport-  
62 related proteins from this set based on UniProtKB GO annotations (Figure 1). To combine the  
63 information from all these databases, we access them via their respective REST APIs. Specifically,  
64 we use the *interactors* API method of STITCH to obtain interacting proteins with the input  
65 chemical, then the *interaction\_partners* API method of STRING to expand the set of proteins. We  
66 convert the STRING identifiers to UniProt IDs using the UniProt Retrieve/ID mapping service and  
67 subsequently retrieve the UniProtKB record for each ID via the UniProt API. Each record contains  
68 information about the protein, and as we search specifically for transporters, we filter the records  
69 based on keywords related to transport activity. We have used UniProt GO annotations for cellular

70 components, molecular functions, and biological processes to generate a list of transporter-related  
71 keywords. After removing protein entries unrelated to transport, the UniProtKB accession number,  
72 protein name, and organism name are retrieved from UniProtKB. The interaction between the  
73 compound and each putative transporter is scored using the combined score from the network  
74 STITCH API, as described in (Szklarczyk *et al.*, 2016).

75 The web application is based on Python3 and uses STITCH, STRING, and UniProt APIs. We use  
76 the python packages requests, csv, json and sys. Furthermore, asyncio and aiohttp are used to make  
77 asynchronous API calls. The web application has been developed using an Express NodeJS web  
78 application framework in combination with the basic web application building blocks, HTML,  
79 CSS, and Javascript.

### 80 **3 Availability**

81  
82 On the online server <https://transporterpal.com>, the user enters a natural compound and, optionally,  
83 an organism. A link to available organisms is provided on the website. When the web application  
84 has finished, it sends an email containing a CSV file and a FASTA file containing the amino acid  
85 sequences of the identified transporters.

86

### 87 **4 Current benchmarking**

88 Although the algorithm works with any organism, we tested the algorithm on a data set of bacterial  
89 transporters extracted from the Transporter Classification Database (Saier *et al.*, 2021), a database  
90 containing experimentally verified transporters, to quantify the number of transporters we can  
91 retrieve by using the algorithm. We chose transporters of degradation pathways and secondary

92 metabolite biosynthesis produced by specific bacteria and corroborated their pathway in MetaCyc  
93 (Caspi *et al.*, 2020). We selected transporters from 61 transporter classification IDs, each  
94 containing one or more transporters, in total 95 transporters (Supplementary data). A few of the  
95 transporters mediate transport of more than one compound, which makes 90 of the transporters  
96 unique. Of the unique transporters, 35 were not present in the databases; For 20 compounds,  
97 transporters related to a specific organism were unavailable in STITCH, primarily due to  
98 unrepresented species. Additional nine transporters were not present in the STRING database.  
99 Furthermore, six transporters did not have a link between the STRING and UniProtKB databases.  
100 From the remaining data set of 55 proteins, 14 transporters were not found either because they  
101 were not among the interaction partner proteins or because they did not contain the transporter-  
102 related GO-annotation keywords. Ultimately, 41 proteins were correctly retrieved, corresponding  
103 to 46% of the 90 unique transporters. The predictive power of TransporterPAL depends on  
104 available data, highlighting the need for more experimental research on transporter function  
105 characterization.

106

## 107 **5 Conclusion**

108 We have developed a web application to predict potential transporters based on the pathway genes  
109 and interacting proteins of a given compound and organism. With more research on transporters  
110 and the addition of knowledge into the STITCH, STRING, and UniProtKB databases, we expect  
111 to increase the success rate of retrieving suitable proteins with transport activity for a specific  
112 compound. While we focus on transporters, this method is easily extendable to study other  
113 pathway proteins by changing the filters in the GO annotation to keywords suitable for a particular

114 protein family class. To our knowledge, this is the first tool able to link potential transporters to a  
115 given natural product.

## 116 **Funding**

117 This work was supported by the European Research Council [YEAST-TRANS project, Grant  
118 Agreement No. 757384] and the Novo Nordisk Foundation [Grant Agreement No.  
119 NNF20CC0035580, NNF20OC0060809, and NNF14CC0001].

120

## 121 **Conflict of Interest:**

122 None declared.

## 123 **References**

124 Bateman,A. *et al.* (2021) UniProt: The universal protein knowledgebase in 2021. *Nucleic Acids*  
125 *Res.*, **49**, D480–D489.

126 Caspi,R. *et al.* (2020) The MetaCyc database of metabolic pathways and enzymes-a 2019 update.  
127 *Nucleic Acids Res.*, **48**, D455–D453.

128 van der Hoek,S.A. and Borodina,I. (2020) Transporter engineering in microbial cell factories: the  
129 ins, the outs, and the in-betweens. *Curr. Opin. Biotechnol.*, **66**, 186–194.

130 Saier,M.H. *et al.* (2021) The transporter classification database (TCDB): 2021 update. *Nucleic*  
131 *Acids Res.*, **49**, D461–D467.

132 Szklarczyk,D. *et al.* (2016) STITCH 5: augmenting protein-chemical interaction networks with

133 tissue and affinity data. *Nucleic Acids Res.*, **44**, D380-D384.

134 Szklarczyk,D. *et al.* (2021) The STRING database in 2021: customizable protein-protein  
135 networks, and functional characterization of user-uploaded gene/measurement sets. *Nucleic*  
136 *Acids Res.*, **49**, D605–D612.

137

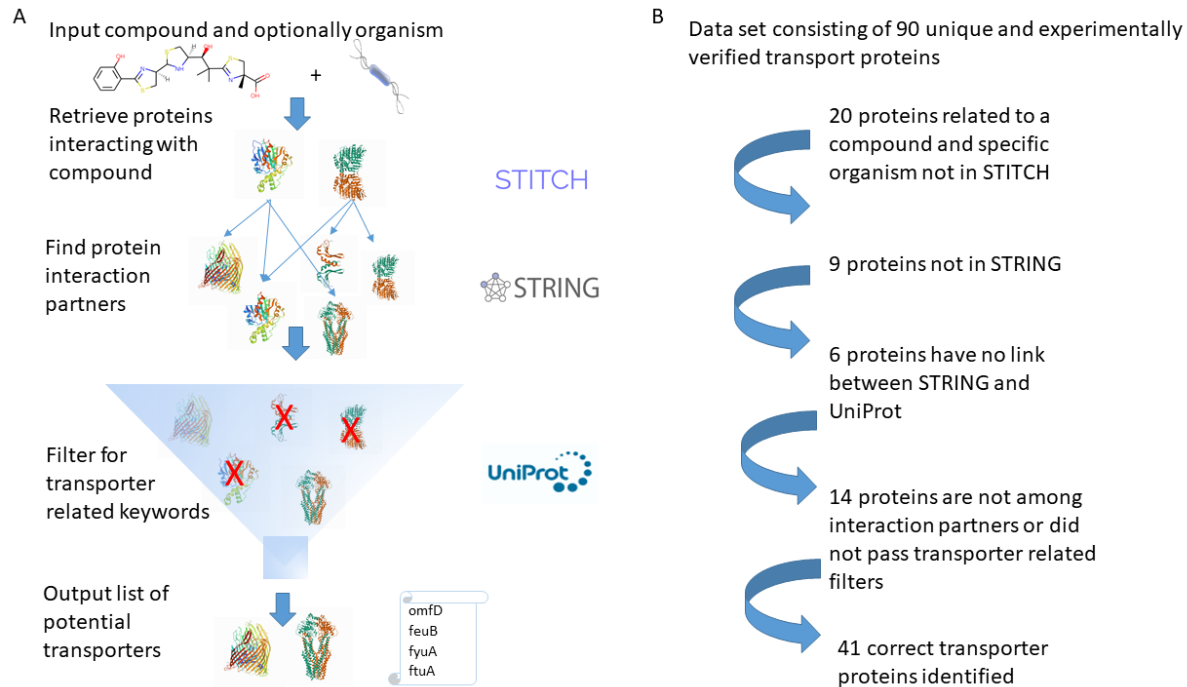

138

139 Figure 1. TransporterPAL workflow for transporter identification. Panel A. We use the STITCH  
140 database to extract pathway genes and proteins interacting with the compound for an organism.  
141 This set of proteins is expanded by their interaction partners using STRING. The list contains  
142 non-transporter-related proteins, and we exclude these by filtering for transporter-related GO  
143 annotations using UniProt to obtain a final list of potential transporters for the compound. Panel  
144 B. 90 unique, experimentally verified transporter proteins were used in the test set. Twenty  
145 proteins related to a compound and specific organism were unavailable in STITCH. Nine  
146 proteins were not present in the STRING, and six transporters did not have a link between the  
147 STRING and UniProt databases. In the remaining data set of 55 transporters, 14 were not found,  
148 resulting in 41 correctly identified transporter proteins.
